# Supplementary material for: British Thoracic Society guideline for respiratory management of children with neuromuscular weakness
Source: HighWire-hosted journal article supplement (doi:10.1136/thoraxjnl-2012-201964), 2012-06-22
Supplement: thoraxjnl-2012-201964-s3.pdf [file thoraxjnl-2012-201964-s3.pdf]

## **BTS Guideline for Respiratory Management of Children with Neuromuscular Weakness**

### **Appendix 4**

**Search strategy: Run March 2010 and May 2011**

#### **Databases searched:**

MEDLINE (Ovid)  
MEDLINE In-Process & Other Non-Indexed Citations (Ovid)  
EMBASE (Ovid)  
PsycInfo (Ovid)  
CINAHL (EBSCO)  
The Cochrane Library

#### **Search Strategies**

##### **MEDLINE (Ovid)**

##### **MEDLINE In-Process & Other Non-Indexed Citations (Ovid)**

1. exp \*Muscular Atrophy, Spinal/
2. \*muscular dystrophies/ or \*muscular dystrophies, limb-girdle/ or \*muscular dystrophy, duchenne/ or \*muscular dystrophy, emery-dreifuss/ or \*muscular dystrophy, facioscapulohumeral/ or \*myotonic dystrophy/ or \*neuromuscular diseases/ or \*muscular disorders, atrophic/ or \*mitochondrial myopathies/ or \*myotonic disorders/
3. \*myopathies, structural, congenital/ or \*myopathies, nemaline/ or \*myopathy, central core/
4. \*Myasthenic Syndromes, Congenital/
5. ((muscular atrophy or muscular atrophies) adj2 (spine or spinal)).ti,ab.
6. (myotonic dystrophy or myotonic dystrophies).ti,ab.
7. congenital myasthenic syndrome\$.ti,ab.
8. ((muscular dystrophy or muscular dystrophies) adj2 (congenital or merosin or facioscapulohumeral or fukuyama or emery\$ or limb girdle or rigid spine or ullrich or duchenne or becker)).ti,ab.
9. ((myopathy or myopathies) adj2 (minicore or multi-minicore or centronuclear or central core or nemaline or myotubular or fibre type disproportion or congenital or mitochondrial)).ti,ab.
10. (neuromuscular condition\$ or neuromuscular weakness\$ or neuromuscular disease\$).ti,ab.
11. exp \*"Hereditary Sensory and Motor Neuropathy"/
12. \*Glycogen Storage Disease Type II/
13. (charcot marie tooth disease or dejerine sottas disease or pompe disease or glycogen storage disease).ti,ab.
14. (hereditary sensory adj motor neuropath\$).ti,ab.
15. or/1-14
16. exp \*Plethysmography/
17. plethysmography.ti,ab.
18. \*Scoliosis/
19. (scoliosis or spinal bracing or sniff nasal inspiratory pressure).ti,ab.
20. exp \*Functional Residual Capacity/
21. functional residual capacity.ti,ab.
22. \*Capnography/

23. (capnography or transcutaneous carbon dioxide or aspiration lung disease or video fluoroscopy).ti,ab.
24. (swallow time or eating time).ti,ab.
25. (flexible endoscopic evaluation adj2 swallowing).ti,ab.
26. (spirometry or inspiratory pressure or expiratory pressure or cough peak flow).ti,ab.
27. \*Polysomnography/
28. exp \*Oximetry/
29. (pulse oximetry or home oximetry or blood gas analys\$).ti,ab.
30. or/16-29
31. ((airway adj2 clear\$) or chest physiotherapy or assisted coughing or percussionaire).ti,ab.
32. respiratory muscle train\$.ti,ab.
33. \*Breathing Exercises/
34. \*Chest Wall Oscillation/
35. (chest wall oscillation or glossopharyngeal breathing or therapy vest\$ or breath stacking or frog breathing or cycle of breathing technique or power breath\$).ti,ab.
36. (maximum insufflation capacity or mechanical insufflation exsufflation).ti,ab.
37. (mucolytic or pulmozyme or dornase or dnase or hypertonic saline).ti,ab.
38. (inhaled therapy or humidification or threshold training or incremental endurance).ti,ab.
39. or/31-38
40. \*Respiration, Artificial/
41. \*Tracheostomy/
42. (ventilation or ventilator\$).ti,ab.
43. hayek.ti,ab.
44. (pressure support or pressure control).ti,ab.
45. (chest wall growth or chest wall shape or lung growth or pectus excavatum).ti,ab.
46. mask interface.ti,ab.
47. facial deformit\$.ti,ab.
48. or/40-47
49. (glycopyrrolate or hyoscine).ti,ab.
50. (prophylactic\$ adj2 antibiotic\$).ti,ab.
51. exp \*Gastroesophageal Reflux/
52. (gastroesophageal reflux or gastro esophageal reflux or gastroesophageal reflux or gastro oesophageal reflux).ti,ab.
53. (ph studies or ph study).ti,ab.
54. \*Fundoplication/
55. (fundoplication or impedance).ti,ab.
56. (salivary duct adj2 ligat\$).ti,ab.
57. exp \*Botulinum Toxins/
58. botulinum toxin\$.ti,ab.
59. \*Influenza Vaccines/
60. \*Pneumococcal Vaccines/
61. ((influenza or flu or pneumococc\$) adj2 vaccin\$).ti,ab.
62. palivizumab.ti,ab.
63. or/49-62
64. \*nutrition assessment/
65. \*Nutritional Status/
66. nutrition\$.ti,ab.
67. \*Obesity/
68. (obese or obesity or overweight).ti,ab.
69. \*Gastrostomy/
70. gastrostomy.ti,ab.

71. \*Enteral Nutrition/
72. ((nasogastric or nasogastric or over-night or overnight or pump) adj feeding).ti,ab.
73. or/64-72
74. exp \*Anesthesia/ or exp \*Anesthetics/
75. (anesthetic\$ or anaesthetic\$ or anesthesia\$ or anaesthesia\$ or muscle relax\$).ti,ab.
76. exp \*perioperative care/ or \*preoperative care/
77. (preoperative or pre-operative or postoperative or post-operative).ti,ab.
78. or/74-77
79. \*Intensive Care/
80. intensive care.ti,ab.
81. exp \*Intubation/
82. intubat\$.ti,ab.
83. \*"Transportation of Patients"/ or \*Patient Transfer/
84. (patient\$ adj (transport\$ or transfer\$)).ti,ab.
85. \*Ventilator Weaning/
86. weaning.ti,ab.
87. or/79-86
88. (transition adj2 care).ti,ab.
89. \*"Continuity of Patient Care"/
90. (transition adj2 (paediatric or pediatric or adult)).ti,ab.
91. ((paediatric or pediatric) adj2 adult).ti,ab.
92. or/88-91
93. \*palliative care/ or exp \*terminal care/
94. (hospice\$ or palliative or terminal care).ti,ab.
95. (advanced care plan\$ or ambulance directive\$ or dnar order\$ or resuscitation order\$).ti,ab.
96. \*"Quality of Life"/
97. (quality adj2 life).ti,ab.
98. \*Ethics/
99. (ethics or ethical).ti,ab.
100. or/93-99
101. 30 or 39 or 48 or 63 or 73 or 78 or 87 or 92 or 100
102. 15 and 101
103. animals/ not (animals/ and humans/)
104. 102 not 103
105. case reports.pt.
106. 104 not 105
107. (201003\$ or 201004\$ or 201005\$ or 201006\$ or 201007\$ or 201008\$ or 201009\$ or 201010\$ or 201011\$ or 201012\$ or 2011\$).ed.
108. 106 and 107

### **EMBASE (Ovid)**

1. \*spinal muscular atrophy/ or \*hereditary spinal muscular atrophy/
2. \*muscular dystrophy/ or \*becker muscular dystrophy/ or \*duchenne muscular dystrophy/ or \*emery dreifuss muscular dystrophy/ or \*facioscapulohumeral muscular dystrophy/ or \*fukuyama congenital muscular dystrophy/ or \*limb girdle muscular dystrophy/ or \*myotonic dystrophy/
3. \*neuromuscular disease/ or \*hereditary motor sensory neuropathy/
4. \*muscle atrophy/
5. \*myotonia/
6. \*neuromuscular junction disorder/

7. \*glycogen storage disease type 2/
8. \*congenital myasthenic syndrome/
9. \*myopathy/ or \*central core disease/ or \*central core disease/ or \*centronuclear myopathy/ or \*multiminicore disease/ or \*nemaline myopathy/ or \*mitochondrial myopathy/
10. ((muscular atrophy or muscular atrophies) adj2 (spine or spinal)).ti,ab.
11. (myotonic dystrophy or myotonic dystrophies).ti,ab.
12. congenital myasthenic syndrome\$.ti,ab.
13. ((muscular dystrophy or muscular dystrophies) adj2 (congenital or merosin or facioscapulohumeral or fukuyama or emery\$ or limb girdle or rigid spine or ullrich or duchenne or becker)).ti,ab.
14. ((myopathy or myopathies) adj2 (minicore or multi-minicore or centronuclear or central core or nemaline or myotubular or fibre type disproportion or congenital or mitochondrial)).ti,ab.
15. (neuromuscular condition\$ or neuromuscular weakness\$ or neuromuscular disease\$).ti,ab.
16. (charcot marie tooth disease or dejerine sottas disease or pompe disease or glycogen storage disease).ti,ab.
17. (hereditary sensory adj motor neuropath\$).ti,ab.
18. or/1-17
19. exp \*plethysmography/
20. plethysmography.ti,ab.
21. exp \*scoliosis/
22. (scoliosis or spinal bracing or sniff nasal inspiratory pressure).ti,ab.
23. \*functional residual capacity/
24. functional residual capacity.ti,ab.
25. \*capnography/
26. (capnography or transcutaneous carbon dioxide or aspiration lung disease or video fluoroscopy).ti,ab.
27. (swallow time or eating time).ti,ab.
28. (flexible endoscopic evaluation adj2 swallowing).ti,ab.
29. (spirometry or inspiratory pressure or expiratory pressure or cough peak flow).ti,ab.
30. \*polysomnography/
31. exp \*oximetry/
32. (pulse oximetry or home oximetry or blood gas analys\$).ti,ab.
33. or/19-32
34. ((airway adj2 clear\$) or chest physiotherapy or assisted coughing or percussionaire).ti,ab.
35. respiratory muscle train\$.ti,ab.
36. \*breathing exercise/
37. \*chest wall oscillation/
38. (chest wall oscillation or glossopharyngeal breathing or therapy vest\$ or breath stacking or frog breathing or cycle of breathing technique or power breath\$).ti,ab.
39. (maximum insufflation capacity or mechanical insufflation exsufflation).ti,ab.
40. (mucolytic or pulmozyme or dornase or dnase or hypertonic saline).ti,ab.
41. (inhaled therapy or humidification or threshold training or incremental endurance).ti,ab.
42. or/34-41
43. exp \*artificial ventilation/
44. \*tracheostomy/
45. (ventilation or ventilator\$).ti,ab.
46. hayek.ti,ab.
47. (pressure support or pressure control).ti,ab.
48. (chest wall growth or chest wall shape or lung growth or pectus excavatum).ti,ab.
49. mask interface.ti,ab.
50. facial deformit\$.ti,ab.

51. or/43-50
52. (glycopyrrolate or hyoscine).ti,ab.
53. (prophylactic\$ adj2 antibiotic\$).ti,ab.
54. \*gastroesophageal reflux/
55. (gastroesophageal reflux or gastro esophageal reflux or gastrooesophageal reflux or gastro oesophageal reflux).ti,ab.
56. (ph studies or ph study).ti,ab.
57. \*stomach fundoplication/
58. (fundoplication or impedance).ti,ab.
59. (salivary duct adj2 ligat\$).ti,ab.
60. \*botulinum toxin/
61. botulinum toxin\$.ti,ab.
62. \*influenza vaccine/
63. \*Pneumococcus vaccine/
64. ((influenza or flu or pneumococc\$) adj2 vaccin\$).ti,ab.
65. palivizumab.ti,ab.
66. or/52-65
67. \*nutritional assessment/
68. \*nutritional assessment/
69. nutrition\$.ti,ab.
70. \*obesity/
71. (obese or obesity or overweight).ti,ab.
72. \*gastrostomy/
73. gastrostomy.ti,ab.
74. \*enteric feeding/
75. ((nasogastric or nasogastric or over-night or overnight or pump) adj feeding).ti,ab.
76. or/67-75
77. exp \*anesthesia/
78. exp \*anesthetic agent/
79. (anesthetic\$ or anaesthetic\$ or anesthesia\$ or anaesthesia\$ or muscle relax\$).ti,ab.
80. \*perioperative period/
81. \*perioperative period/
82. \*preoperative care/
83. (preoperative or pre-operative or postoperative or post-operative).ti,ab.
84. or/77-83
85. \*intensive care/ or \*pediatric advanced life support/
86. intensive care.ti,ab.
87. exp \*intubation/
88. intubat\$.ti,ab.
89. \*patient transport/
90. (patient\$ adj (transport\$ or transfer\$)).ti,ab.
91. weaning.ti,ab.
92. or/85-91
93. (transition adj2 care).ti,ab.
94. (transition adj2 (paediatric or pediatric or adult)).ti,ab.
95. ((paediatric or pediatric) adj2 adult).ti,ab.
96. or/93-95
97. \*palliative therapy/
98. exp \*terminal care/
99. (hospice\$ or palliative or terminal care).ti,ab.
100. (advanced care plan\$ or ambulance directive\$ or dnar order\$ or resuscitation order\$).ti,ab.

101. \*"quality of life"/
102. (quality adj2 life).ti,ab.
103. \*ethics/
104. (ethics or ethical).ti,ab.
105. or/97-104
106. 33 or 42 or 51 or 66 or 76 or 84 or 92 or 96 or 105
107. 18 and 106
108. animal/ or nonhuman/
109. human/
110. 108 not (108 and 109)
111. 107 not 110
112. case report/
113. 111 not 112
114. ("201001" or "201002" or "201003" or "201004" or "201005" or "201006" or "201007" or "201008" or "201009").em.
115. (2010\$ or 2011\$).em.
116. 115 not 114
117. 113 and 116

### **PsycINFO (Ovid)**

1. ((muscular atrophy or muscular atrophies) adj2 (spine or spinal)).ti,ab.
2. (myotonic dystrophy or myotonic dystrophies).ti,ab.
3. congenital myasthenic syndrome\$.ti,ab.
4. ((muscular dystrophy or muscular dystrophies) adj2 (congenital or merosin or facioscapulohumeral or fukuyama or emery\$ or limb girdle or rigid spine or ullrich or duchenne or becker)).ti,ab.
5. ((myopathy or myopathies) adj2 (minicore or multi-minicore or centronuclear or central core or nemaline or myotubular or fibre type disproportion or congenital or mitochondrial)).ti,ab.
6. (neuromuscular condition\$ or neuromuscular weakness\$ or neuromuscular disease\$).ti,ab.
7. (charcot marie tooth disease or dejerine sottas disease or pompe disease or glycogen storage disease).ti,ab.
8. (hereditary sensory adj motor neuropath\$).ti,ab.
9. or/1-8
10. plethysmography.ti,ab.
11. (scoliosis or spinal bracing or sniff nasal inspiratory pressure).ti,ab.
12. functional residual capacity.ti,ab.
13. (capnography or transcutaneous carbon dioxide or aspiration lung disease or video fluoroscopy).ti,ab.
14. (swallow time or eating time).ti,ab.
15. (flexible endoscopic evaluation adj2 swallowing).ti,ab.
16. (spirometry or inspiratory pressure or expiratory pressure or cough peak flow).ti,ab.
17. (pulse oximetry or home oximetry or blood gas analys\$).ti,ab.
18. or/10-17
19. ((airway adj2 clear\$) or chest physiotherapy or assisted coughing or percussionaire).ti,ab.
20. respiratory muscle train\$.ti,ab.
21. (chest wall oscillation or glossopharyngeal breathing or therapy vest\$ or breath stacking or frog breathing or cycle of breathing technique or power breath\$).ti,ab.
22. (maximum insufflation capacity or mechanical insufflation exsufflation).ti,ab.
23. (mucolytic or pulmozyme or dornase or dnase or hypertonic saline).ti,ab.

24. (inhaled therapy or humidification or threshold training or incremental endurance).ti,ab.
25. or/19-24
26. (ventilation or ventilator\$).ti,ab.
27. hayek.ti,ab.
28. (pressure support or pressure control).ti,ab.
29. (chest wall growth or chest wall shape or lung growth or pectus excavatum).ti,ab.
30. mask interface.ti,ab.
31. facial deformit\$.ti,ab.
32. or/26-31
33. (glycopyrrolate or hyoscine).ti,ab.
34. (prophylactic\$ adj2 antibiotic\$).ti,ab.
35. (gastroesophageal reflux or gastro esophageal reflux or gastrooesophageal reflux or gastro oesophageal reflux).ti,ab.
36. (ph studies or ph study).ti,ab.
37. (fundoplication or impedance).ti,ab.
38. (salivary duct adj2 ligat\$).ti,ab.
39. botulinum toxin\$.ti,ab.
40. ((influenza or flu or pneumococc\$) adj2 vaccin\$).ti,ab.
41. palivizumab.ti,ab.
42. or/33-41
43. nutrition\$.ti,ab.
44. (obese or obesity or overweight).ti,ab.
45. gastrostomy.ti,ab.
46. ((nasogastric or nasogastric or over-night or overnight or pump) adj feeding).ti,ab.
47. or/43-46
48. (anesthetic\$ or anaesthetic\$ or anesthesia\$ or anaesthesia\$ or muscle relax\$).ti,ab.
49. (preoperative or pre-operative or postoperative or post-operative).ti,ab.
50. or/48-49
51. intensive care.ti,ab.
52. intubat\$.ti,ab.
53. (patient\$ adj (transport\$ or transfer\$)).ti,ab.
54. weaning.ti,ab.
55. or/51-54
56. (transition adj2 (paediatric or pediatric or adult)).ti,ab.
57. ((paediatric or pediatric) adj2 adult).ti,ab.
58. (transition adj2 care).ti,ab.
59. or/56-58
60. (hospice\$ or palliative or terminal care).ti,ab.
61. (advanced care plan\$ or ambulance directive\$ or dnar order\$ or resuscitation order\$).ti,ab.
62. (quality adj2 life).ti,ab.
63. (ethics or ethical).ti,ab.
64. or/60-63
65. 18 or 25 or 32 or 42 or 47 or 50 or 55 or 59 or 64
66. 9 and 65
67. ("20100104" or "20100111" or "20100118" or "20100125" or "20100201" or "20100208" or "20100215" or "20100222").up.
68. (2010\$ or 2011\$).up.
69. 68 not 67
70. 66 and 69

## CINAHL (EBSCO)

- S1 (MM "Muscular Atrophy, Spinal+")
- S2 MM muscular dystrophies or MM muscular dystrophies, limb-girdle or MM muscular dystrophy, duchenne or MM muscular dystrophy, emery-dreifuss or MM muscular dystrophy, facioscapulohumeral or MM myotonic dystrophy or MM neuromuscular diseases or MM muscular disorders, atrophic or MM mitochondrial myopathies or MM myotonic disorders
- S3 MM myopathies, structural, congenital or MM myopathies, nemaline or MM myopathy, central core or MM Myasthenic Syndromes, Congenital
- S4 ("muscular atrophy" n2 spine) or ("muscular atrophy" n2 spinal) or ("muscular atrophies" n2 spine) or ("muscular atrophies" n2 spinal)
- S5 "myotonic dystrophy" or "myotonic dystrophies"
- S6 "congenital myasthenic syndrome\*"
- S7 ("muscular dystroph\*" n2 congenital) or ("muscular dystroph\*" n2 merosin) or ("muscular dystroph\*" n2 facioscapulohumeral) or ("muscular dystroph\*" n2 fukuyama) or ("muscular dystroph\*" n2 emery\*) or ("muscular dystroph\*" n2 "limb girdle") or ("muscular dystroph\*" n2 "rigid spine") or ("muscular dystroph\*" n2 ullrich) or ("muscular dystroph\*" n2 duchenne) or ("muscular dystroph\*" n2 becker)
- S8 (myopath\* n2 minicore) or (myopath\* n2 "multi-minicore") or (myopath\* n2 centronuclear) or (myopath\* n2 "central core") or (myopath\* n2 nemaline) or (myopath\* n2 myotubular) or (myopath\* n2 "fibre type disproportion") or (myopath\* n2 congenital) or (myopath\* n2 mitochondrial)
- S9 "neuromuscular condition\*" or "neuromuscular weakness\*" or "neuromuscular disease\*"
- S10 "charcot marie tooth disease" or "dejerine sottas disease" or "pompe disease" or "glycogen storage disease"
- S11 "hereditary sensory motor neuropath\*"
- S12 S1 or S2 or S3 or S4 or S5 or S6 or S7 or S8 or S9 or S10 or S11
- S13 (MM "Plethysmography+")
- S14 plethysmography
- S15 MM "Scoliosis"
- S16 scoliosis or "spinal bracing" or "sniff nasal inspiratory pressure"
- S17 MM "Functional Residual Capacity"
- S18 "functional residual capacity"
- S19 MM "Capnography"
- S20 capnography or "transcutaneous carbon dioxide" or "aspiration lung disease" or "video fluoroscopy"
- S21 "swallow time" or "eating time"
- S22 ("flexible endoscopic evaluation" n2 swallowing)
- S23 spirometry or "inspiratory pressure" or "expiratory pressure" or "cough peak flow"
- S24 MM "Polysomnography"
- S25 MM "Oximetry+"
- S26 "pulse oximetry" or "home oximetry" or "blood gas analys\*"
- S27 S13 or S14 or S15 or S16 or S17 or S18 or S19 or S20 or S21 or S22 or S23 or S24 or S25 or S26
- S28 (airway n2 clear\*) or "chest physiotherapy" or "assisted coughing" or percussionnaire
- S29 "respiratory muscle train\*"
- S30 MM "Breathing Exercises" or MM "Chest Wall Oscillation"
- S31 "chest wall oscillation" or "glossopharyngeal breathing" or "therapy vest\*" or "breath stacking" or "frog breathing" or "cycle of breathing technique" or "power breath\*"
- S32 "maximum insufflation capacity" or "mechanical insufflation exsufflation"
- S33 mucolytic or pulmozyme or dornase or dnase or "hypertonic saline"
- S34 "inhaled therapy" or humidification or "threshold training" or "incremental endurance"



S35 S28 or S29 or S30 or S31 or S32 or S33 or S34  
 S36 (MM "Respiration, Artificial")  
 S37 (MM "Tracheostomy")  
 S38 ventilation or ventilator\*  
 S39 hayek or "pressure support" or "pressure control" or "chest wall growth" or "chest wall shape" or "lung growth" or "pectus excavatum" or "mask interface" or "facial deformit\*"  
 S40 S36 or S37 or S38 or S39  
 S41 glycopyrrolate or hyoscine or (prophylactic\* n2 antibiotic\*)  
 S42 MM "Gastroesophageal Reflux"  
 S43 "gastroesophageal reflux" or "gastro esophageal reflux" or "gastrooesophageal reflux" or "gastro oesophageal reflux"  
 S44 "ph studies" or "ph study"  
 S45 MM "Fundoplication"  
 S46 fundoplication or impedance or ("salivary duct" n2 ligat\*)  
 S47 MM "Botulinum Toxins+" S48 "botulinum toxin\*"  
 S49 (MM "Influenza Vaccine")  
 S50 (MM "Pneumococcal Vaccine")  
 S51 (influenza n2 vaccin\*) or (flu n2 vaccin\*) or (pneumococc\* n2 vaccin\*)  
 S52 palivizumab  
 S53 S41 or S42 or S43 or S44 or S45 or S46 or S48 or S49 or S50 or S51 or S52  
 S54 MM "Nutritional Status"  
 S55 (MM "Nutritional Assessment")  
 S56 nutrition\*  
 S57 MM "Obesity"  
 S58 obese or obesity or overweight  
 S59 MM "Gastrostomy"  
 S60 gastrostomy  
 S61 MM "Enteral Nutrition"  
 S62 "naso-gastric feeding" or "nasogastric feeding" or "over-night feeding" or "overnight feeding" or "pump feeding"  
 S63 S54 or S55 or S56 or S57 or S58 or S59 or S60 or S61 or S62  
 S64 anesthetic\* or anaesthetic\* or anesthesia\* or anaesthesia\* or "muscle relax\*"  
 S65 (MM "Anesthetics+")  
 S66 (MM "Anesthesia")  
 S67 (MM "perioperative care")  
 S68 (MM "preoperative care")  
 S69 preoperative or "pre-operative" or postoperative or "post-operative"  
 S70 S64 or S65 or S66 or S67 or S68 or S69  
 S71 intensive care  
 S72 (MM "Critical Care")  
 S73 (MM "Intubation")  
 S74 intubat\*  
 S75 MM "Transportation of Patients"  
 S76 (MM "Transfer, Discharge")  
 S77 "patient\* transport\*" or "patient\* transfer\*"  
 S78 MM "Ventilator Weaning"  
 S79 weaning  
 S80 S71 or S72 or S73 or S74 or S75 or S76 or S77 or S78 or S79  
 S81 transition n2 care  
 S82 MM "Continuity of Patient Care"

S83 (transition n2 paediatric) or (transition n2 pediatric) or (transition n2 adult) or (pediatric n2 adult) or (paediatric n2 adult)  
 S84 S81 or S82 or S83  
 S85 MM "palliative care"  
 S86 MM "terminal care"  
 S87 hospice\* or palliative or "terminal care"  
 S88 "advanced care plan\*" or "ambulance directive\*" or "dnar order\*" or "resuscitation order\*"  
 S89 MM "Quality of Life"  
 S90 quality n2 life  
 S91 MM "Ethics"  
 S92 ethics or ethical  
 S93 S85 or S86 or S87 or S88 or S89 or S90 or S91 or S92  
 S94 S27 or S35 or S40 or S53 or S63 or S70 or S80 or S84 or S93  
 S95 S12 and S94  
 S96 (ZD "20100101") or (ZD "20100108") or (ZD "20100115") or (ZD "20100122") or (ZD "20100129") or (ZD "20100205") or (ZD "20100212") or (ZD "20100219") or (ZD "20100226")  
 S97 (ZD "2010\*") or (ZD "2011\*")  
 S98 S97 not S96  
 S99 S95 and S98

## Cochrane Library

#1 MeSH descriptor Muscular Atrophy, Spinal explode all trees  
 #2 MeSH descriptor Muscular Dystrophies, this term only  
 #3 MeSH descriptor Muscular Dystrophies, Limb-Girdle, this term only  
 #4 MeSH descriptor Muscular Dystrophy, Duchenne, this term only  
 #5 MeSH descriptor Muscular Dystrophy, Emery-Dreifuss, this term only  
 #6 MeSH descriptor Muscular Dystrophy, Facioscapulohumeral, this term only  
 #7 MeSH descriptor Myotonic Dystrophy, this term only  
 #8 MeSH descriptor Neuromuscular Diseases, this term only  
 #9 MeSH descriptor Muscular Disorders, Atrophic, this term only  
 #10 MeSH descriptor Mitochondrial Myopathies, this term only  
 #11 MeSH descriptor Myotonic Disorders, this term only  
 #12 MeSH descriptor Myopathies, Structural, Congenital, this term only  
 #13 MeSH descriptor Myopathies, Nemaline, this term only  
 #14 MeSH descriptor Myopathy, Central Core, this term only  
 #15 MeSH descriptor Myasthenic Syndromes, Congenital, this term only 1 edit delete  
 #16 ("muscular atrophy" near/2 spine) or ("muscular atrophy" near/2 spine) or ("muscular atrophies" near/2 spinal) or ("muscular atrophies" near/2 spinal)  
 #17 "myotonic dystrophy" or "myotonic dystrophies"  
 #18 "congenital myasthenic syndrome\*"  
 #19 "muscular dystroph\*"  
 #20 myopath\* near/2 (minicore or "multi-minicore" or centronuclear or "central core" or nemaline or myotubular or "fibre type disproportion" or congenital or mitochondrial)  
 #21 "neuromuscular condition\*" or "neuromuscular weakness\*" or "neuromuscular disease\*"  
 #22 MeSH descriptor Hereditary Sensory and Autonomic Neuropathies explode all trees  
 #23 MeSH descriptor Glycogen Storage Disease Type II, this term only  
 #24 "charcot marie tooth disease" or "dejerine sottas disease" or "pompe disease" or "glycogen storage disease"  
 #25 "hereditary sensory motor neuropath\*"

#26 (#1 OR #2 OR #3 OR #4 OR #5 OR #6 OR #7 OR #8 OR #9 OR #10 OR #11 OR #12 OR #13 OR #14  
OR #15 OR #16 OR #17 OR #18 OR #19 OR #20 OR #21 OR #22 OR #23 OR #24 OR #25)  
#27 (#26), from 2010 to 2011
